# Supplementary material
Source: PubMed Central journal article supplement (PMC7196656)
Supplement: supp_RA119.011138_155945_2_supp_500256_q7v3pd.pdf [file supp_RA119.011138_155945_2_supp_500256_q7v3pd.pdf]

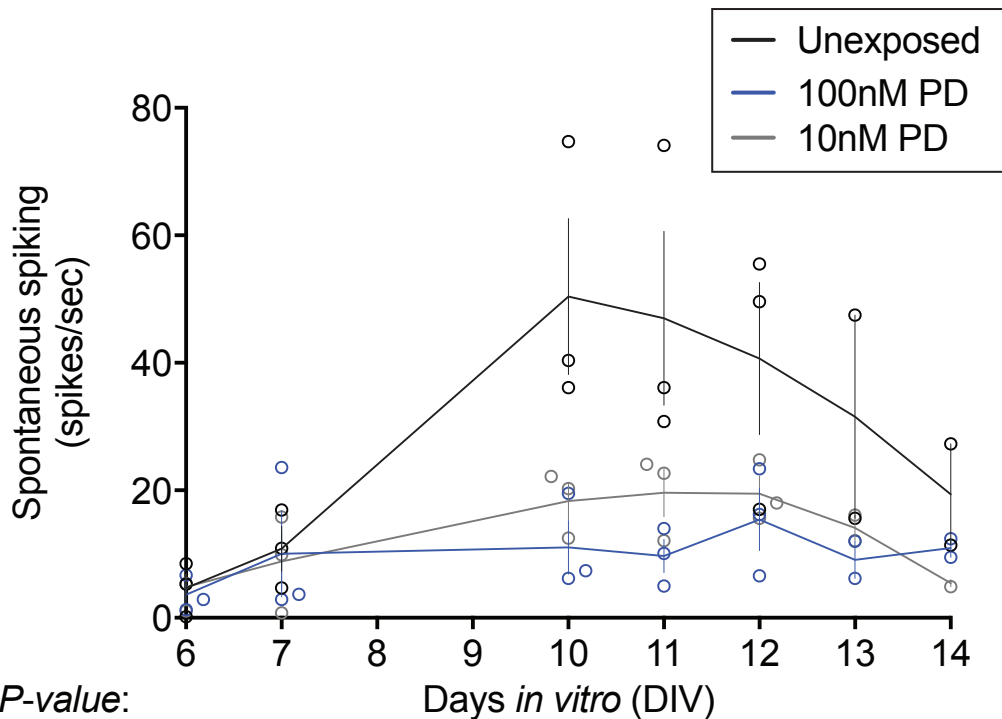

*P-value:*

|           |      |      |   |   |       |       |      |      |      |
|-----------|------|------|---|---|-------|-------|------|------|------|
| Un.-100nM | 0.91 | 0.93 | - | - | <0.01 | <0.01 | 0.01 | 0.10 | 0.45 |
|           |      |      |   |   | **    | **    | *    |      |      |
| Un.-10nM  | 0.99 | 0.83 | - | - | <0.01 | <0.01 | 0.02 | 0.12 | 0.22 |
|           |      |      |   |   | **    | **    | *    |      |      |

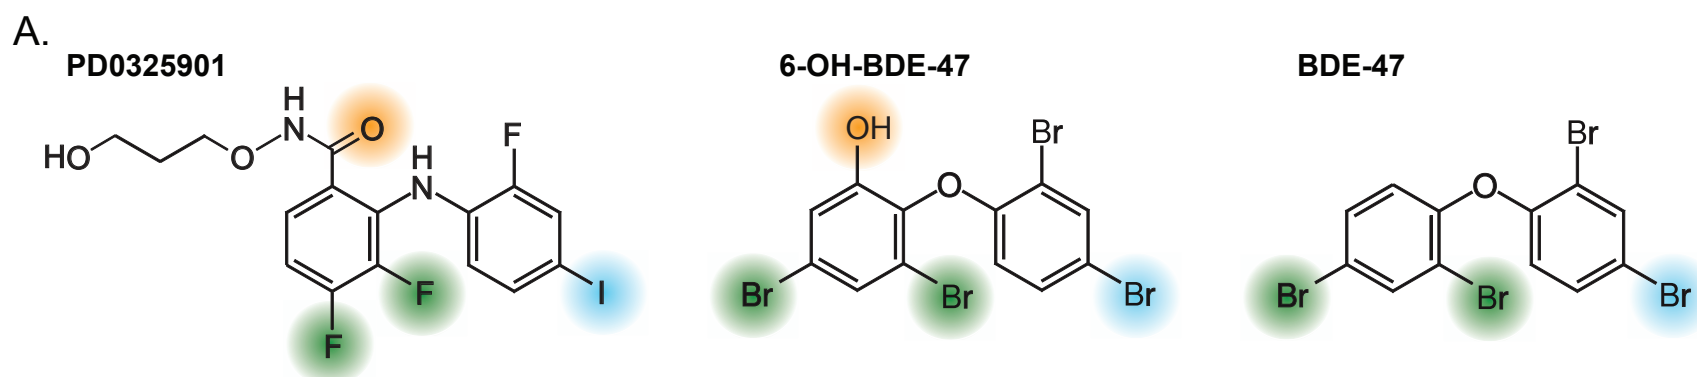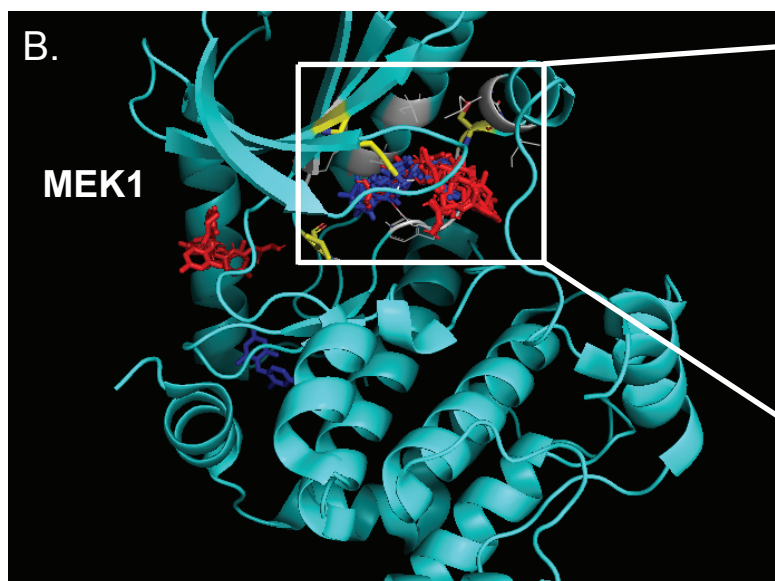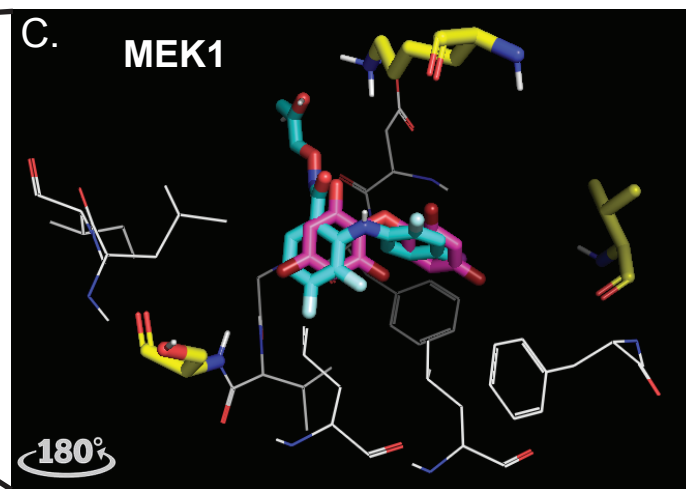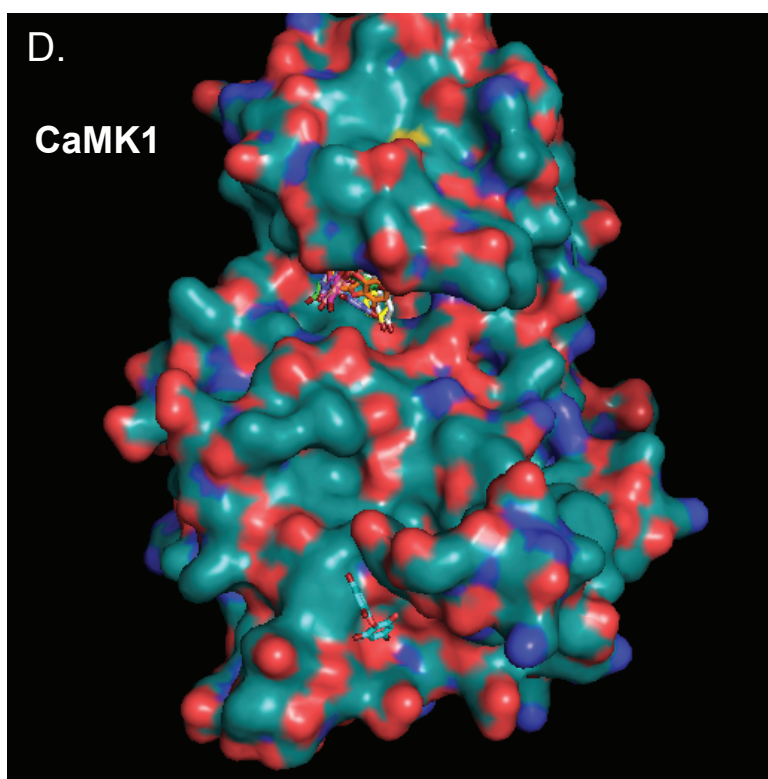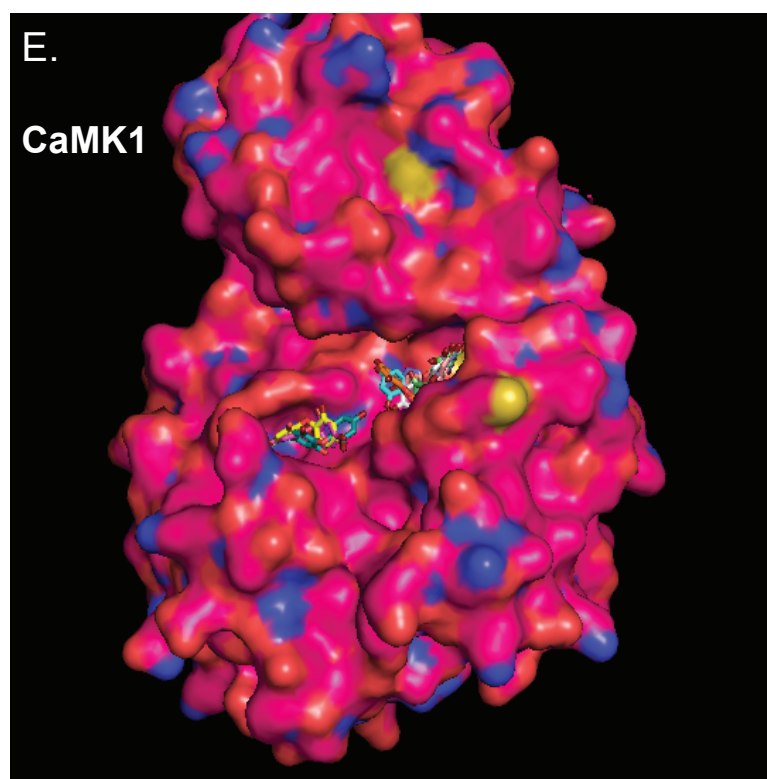

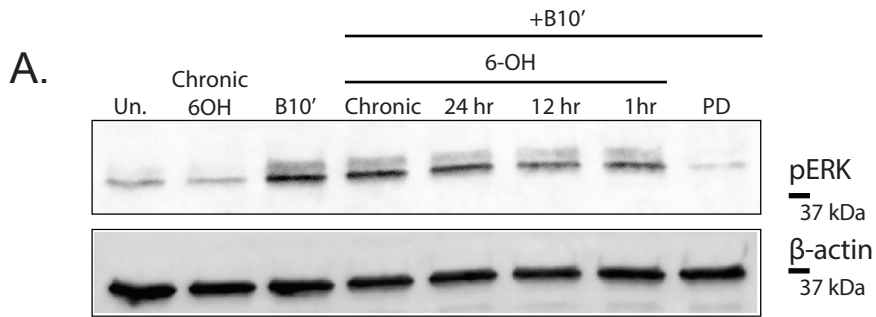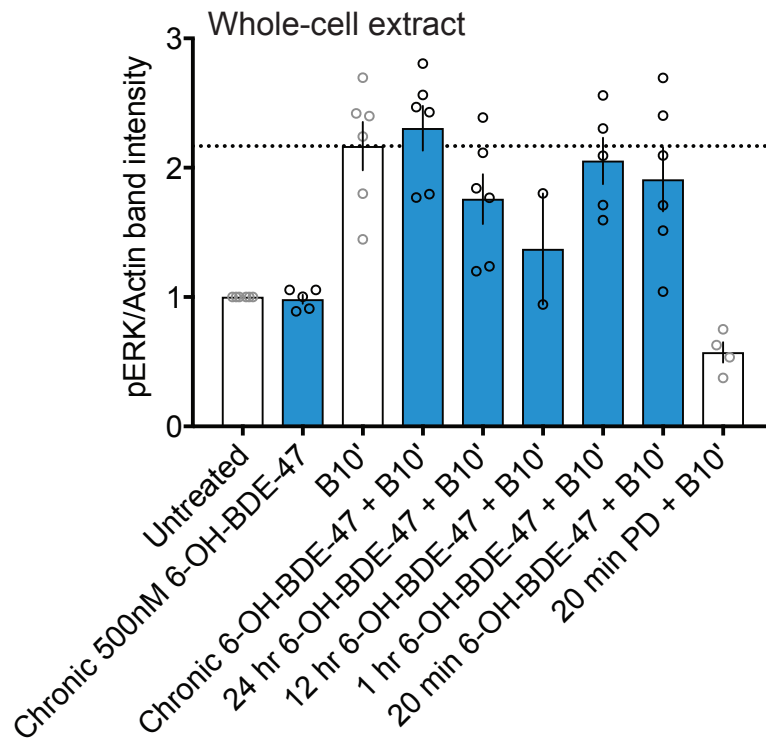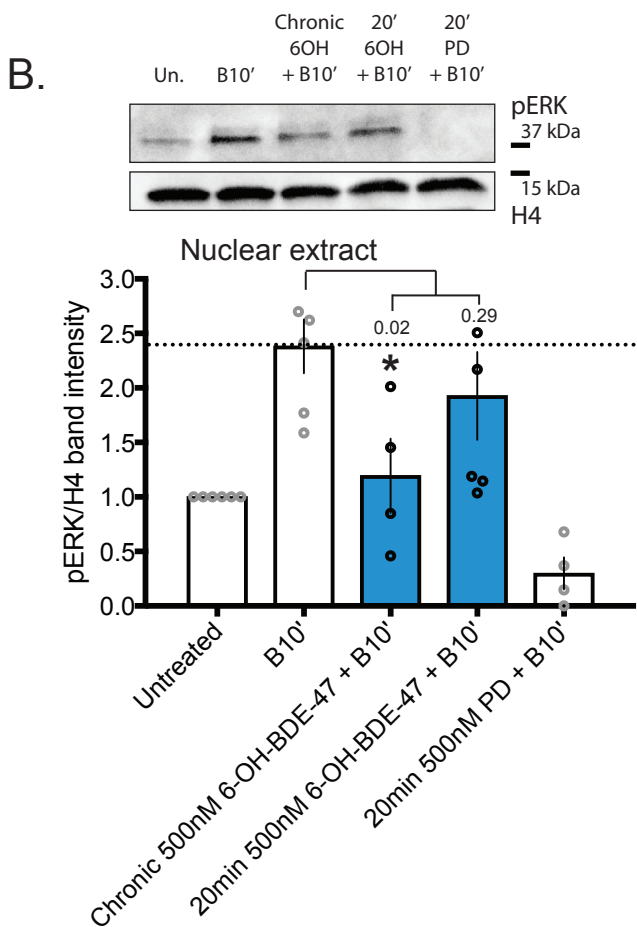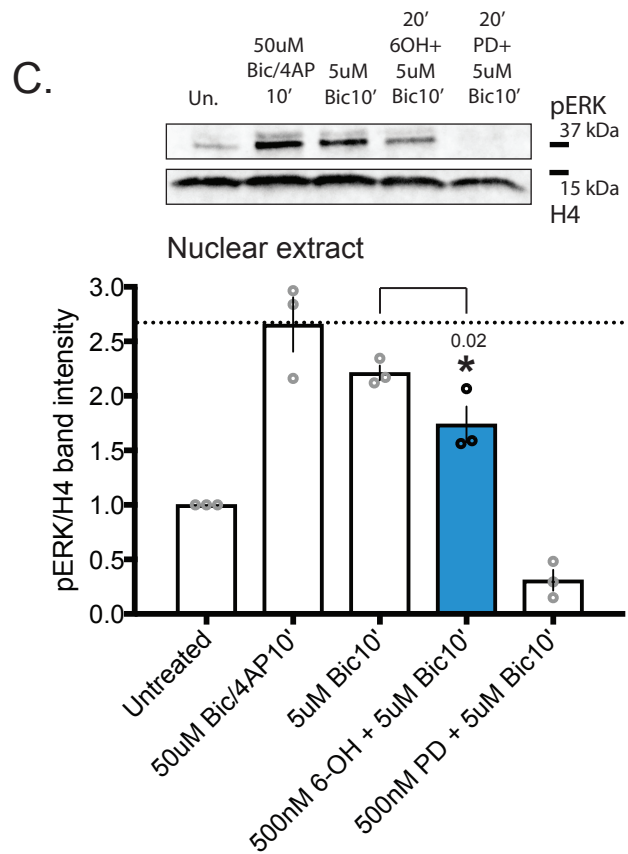

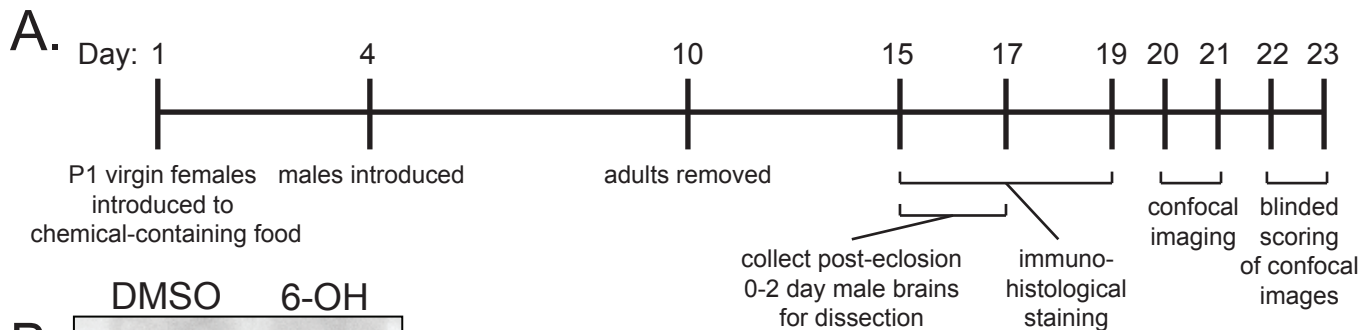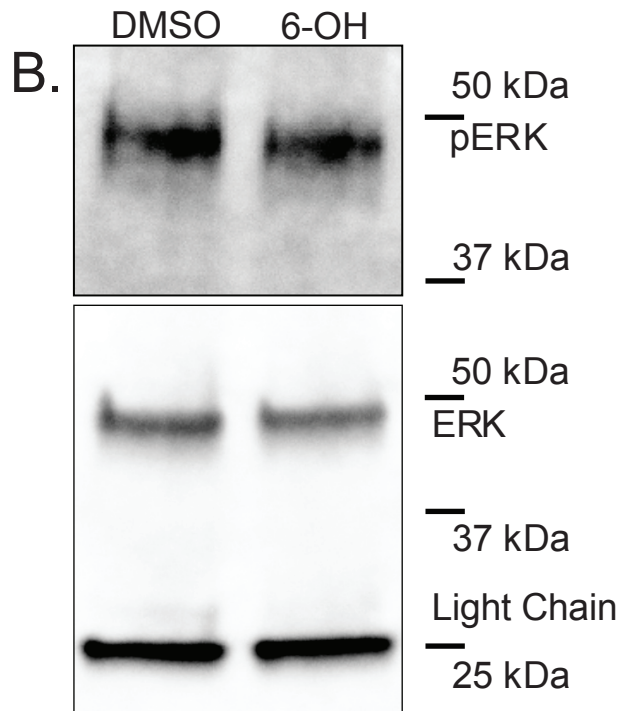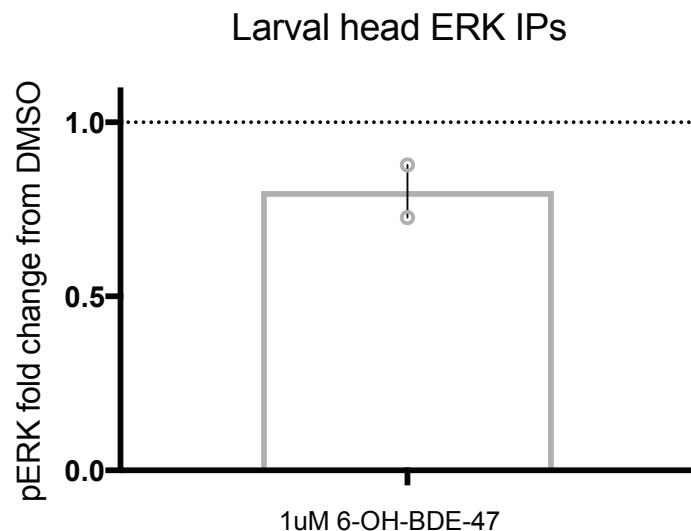

## Certain ortho-hydroxylated brominated ethers are promiscuous kinase inhibitors that impair neuronal signaling and neurodevelopmental processes

Robert G. Poston, Lillian Murphy, Ayna Rejepova, Mina Ghaninejad-Esfahani, Joshua Segales, Kimberly Mulligan, Ramendra N. Saha

### Legends for supplemental figures

#### **Supplemental Figure 1. Chronic PD0325901 exposure suppresses spontaneous neuronal activity.**

Primary embryonic rat cortical neurons grown on MEAs were chronically exposed to low doses of PD0325901, starting at the time of plating, in order to assess whether directly inhibiting MEK-ERK signaling would also affect spontaneous activity (in addition to regulating Bic-induced recurrent synchronous bursting (63)) and if it would produce similar effects as prolonged 6-OH-BDE-47 exposure. Detectable spontaneous activity was recorded and quantified across the first two weeks of growth *in vitro*,  $N=3$ .  $P$ -values generated with two-way ANOVA with post-hoc FDR method, Time  $F(6,36) = 5.409$ ,  $P=0.0005$ , Treatment  $F(2,36)=15.59$ ,  $P<0.0001$ , Interaction  $F(12,36)=1.675$ ,  $P=0.1144$ .

**Supplemental Figure 2. 6-OH-BDE-47 shares key structural features of non-ATP competitive type-III MEK1 inhibitors.** (A) Chemical structures of the commercial MEK1 inhibitor PD0325901, BDE-47, and 6-OH-BDE-47 with key MEK-binding substituents highlighted. (B) Crystal structure of MEK1 (PDB: 3EQI) with top binding poses generated in ligand docking simulations for 6-OH and PD superimposed. (C) Rotated view of the allosteric binding pocket of MEK1 with most realistic generated poses of 6-OH and PD. We subsequently found that 6-OH does not inhibit MEK1 activity in a cell free kinase inhibition screen (Fig. 3). (D-E) Additional ligand-docking simulations conducted with CaMK1 (PDB IDs: 4FG7 (holo, ATP-bound CaMK1) and 4FGB (apo, non-ATP bound CaMK1), respectively). D. displays how the simulated interactions of 6-OH with CaMK1 cluster in the ATP-binding pocket, while in E., simulations conducted with the apo form of CaMK1, where the binding pocket is in a non-ATP bound state, show that 6-OH binding does not localize to the ATP-binding pocket. This provides further evidence for the realistic nature of these binding predictions.

#### **Supplemental Figure 3. Effects of acute environmentally relevant 6-OH-BDE-47 exposures.**

(A) Cells were acutely exposed to an estimated environmentally relevant exposure dose, 500nM, for increasing lengths of time before Bic+4AP stimulation (indicated as +B10') and whole-cell lysate collection,  $N=3-6$ . No significant 6-OH effects were detected. (B) To assess nuclear availability of pERK after 6-OH exposure, nuclear lysates were collected after 10 minute Bic+4AP treatment,  $N=4-5$ .  $P$ -values generated by one-way ANOVA with post-hoc LSD, Treatment  $F(3,16)=7.491$ ,  $P=0.0024$ . (C) Acute 6-OH exposed cells were treated with either Bic+4AP or a lower concentration of Bic without 4AP to assess the effect of stimulus strength on nuclear availability of pERK,  $N=3$ .  $P$ -value generated by unpaired one-tailed t-test. All exposures noted as "chronic" are from the time of plating to the time of corresponding acute exposure experiments (conducted between DIV10 and 14).

#### **Supplemental Figure 4. Additional Drosophila experimental timeline and data**

(A) Detailed experimental timeline for Drosophila exposures and mushroom body axonal midline crossing assessment. (B) Representative western blot of ERK immune-precipitated from whole larval heads. Total ERK was precipitated from the pooled heads of ten DMSO and 6-OH exposed larvae. The fraction of pERK to total ERK was then determined by western blotting as a metric of MEK-ERK signaling *in vivo*. Quantification displayed in right panel.  $N=2$  immuno-precipitations, each with  $n=10$  exposed larval heads.
